# Supplementary material for: Palladium Supported on Porous Organic Polymer as Heterogeneous and Recyclable Catalyst for Cross Coupling Reaction
Source: MDPI journal article supplement (doi:10.3390/molecules27154777), 2022-07-26

# Palladium Supported on Porous Organic Polymer as Heterogeneous and Recyclable Catalyst for Cross Coupling Reaction

Guanying Shi <sup>1</sup> and Zhenhua Dong <sup>2,\*</sup>

<sup>1</sup> Institute of Agricultural Products Processing, Henan Academy of Agricultural Sciences, Zhengzhou 450002, China; wendy1984@foxmail.com

<sup>2</sup> College of Chemistry and Chemical Engineering, Henan University of Technology, Lianhua Street 100, Zhengzhou 450001, China

\* Correspondence: zhdong@haut.edu.cn

## 1. General information

All reagents were of analytical grade and purchased from Innochem Industrial Inc. The chemicals were used without further purification. NMR spectra were recorded at room temperature in CDCl<sub>3</sub> or DMSO-d<sub>6</sub> on 400 MHz spectrometers.

The IR spectra were obtained with KBr pellets in the range of 400–4000 cm<sup>−1</sup> using a PerkinElmer Frontier (Spectrum TWO) spectrometer. The crystallographic structure was characterized by X-ray diffraction (XRD) on an X-ray powder diffractometer (Rigaku SmartLab9, Japan) using Cu Kα radiation ( $\lambda = 1.5406 \text{ \AA}$ ). The morphology of nanopowders was characterized by using a scanning electron microscopy (SEM, Zeiss Sigma 300, Smart EDX). The Brunauer-Emmett-Teller (BET) specific surface area and porosity analysis were carried out using Micromeritics (ASAP 2460) at 77 K with nitrogen. TEM images were recorded on FEI Tecnai G2 F2. Inductively Coupled Plasma Atomic Emission Spectroscopy (ICP-AES) was tested on Agilent 5110. Thermo gravimetric analyses (TGA) were performed on a thermogravimetric/differential thermal analyzer (NETZSCH TG209F1) by heating the samples at 10 °C min<sup>−1</sup> to 800 °C under nitrogen atmosphere.

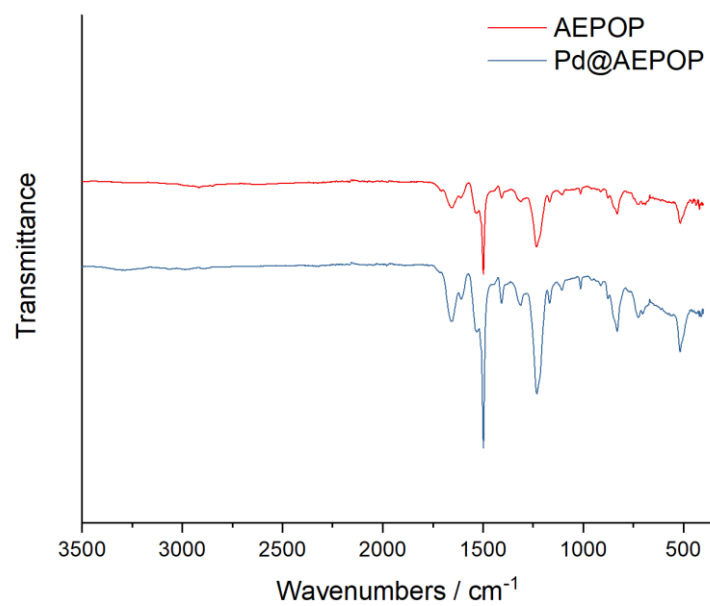

**Figure S1.** FT-IR spectra of AEPOP and Pd@AEPOP.

## 2 Spectra data of products

**3a:**  $^1\text{H}$  NMR (600 MHz, Chloroform- $d$ )  $\delta$  7.54 (d,  $J = 7.7$  Hz, 2H), 7.45 (d,  $J = 7.8$  Hz, 2H), 7.39 (t,  $J = 7.6$  Hz, 2H), 7.33 – 7.25 (m, 1H), 7.21 (d,  $J = 7.7$  Hz, 2H), 7.17 – 7.06 (m, 2H), 2.40 (s, 3H).

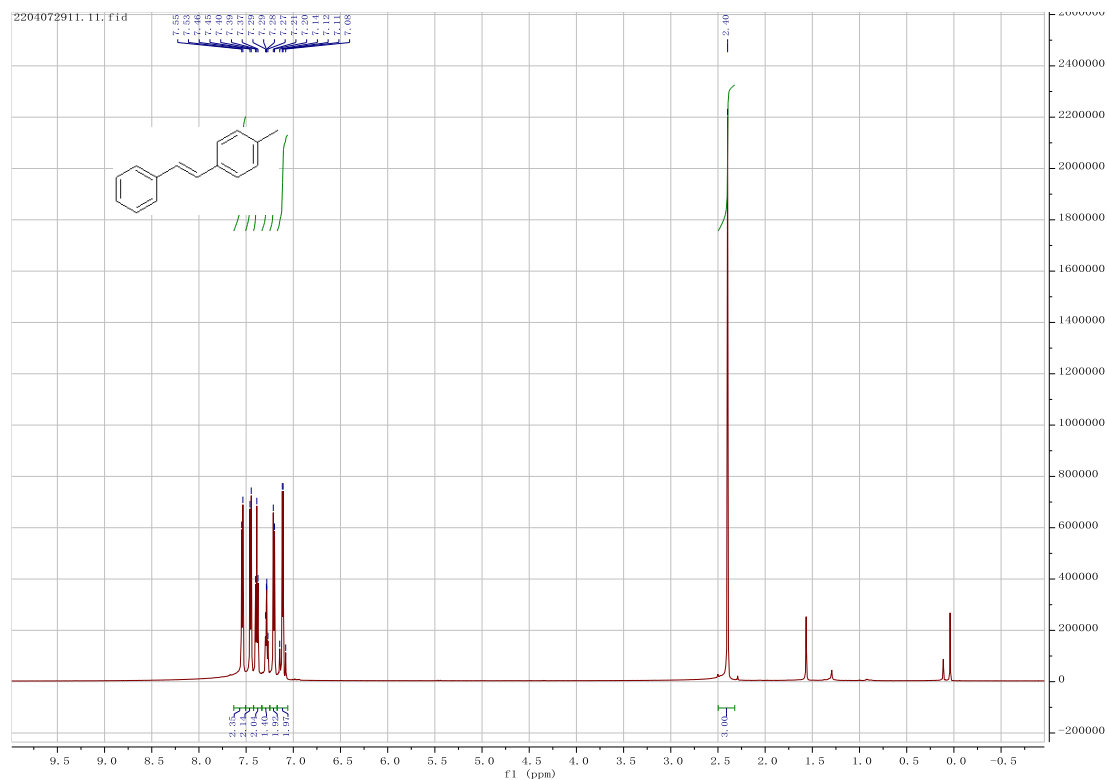

**3b:**  $^1\text{H}$  NMR (400 MHz, Chloroform- $d$ )  $\delta$  7.65 – 7.53 (m, 2H), 7.41 (t,  $J = 7.6$  Hz, 2H), 7.36 – 7.27 (m, 1H), 7.16 (s, 1H).

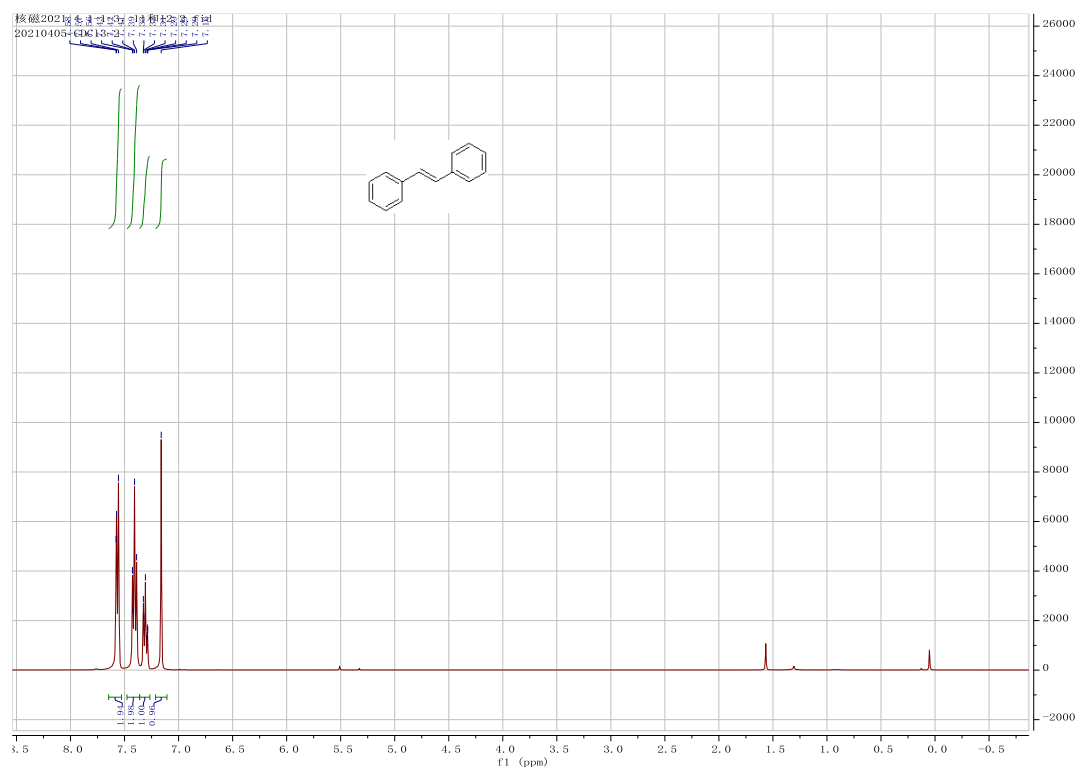

**3c:**  $^1\text{H}$  NMR (400 MHz, Chloroform-*d*)  $\delta$  7.60 – 7.53 (m, 2H), 7.53 – 7.48 (m, 2H), 7.48 – 7.36 (m, 4H), 7.36 – 7.26 (m, 1H), 7.14 (d,  $J = 2.7$  Hz, 2H), 1.38 (s, 9H).

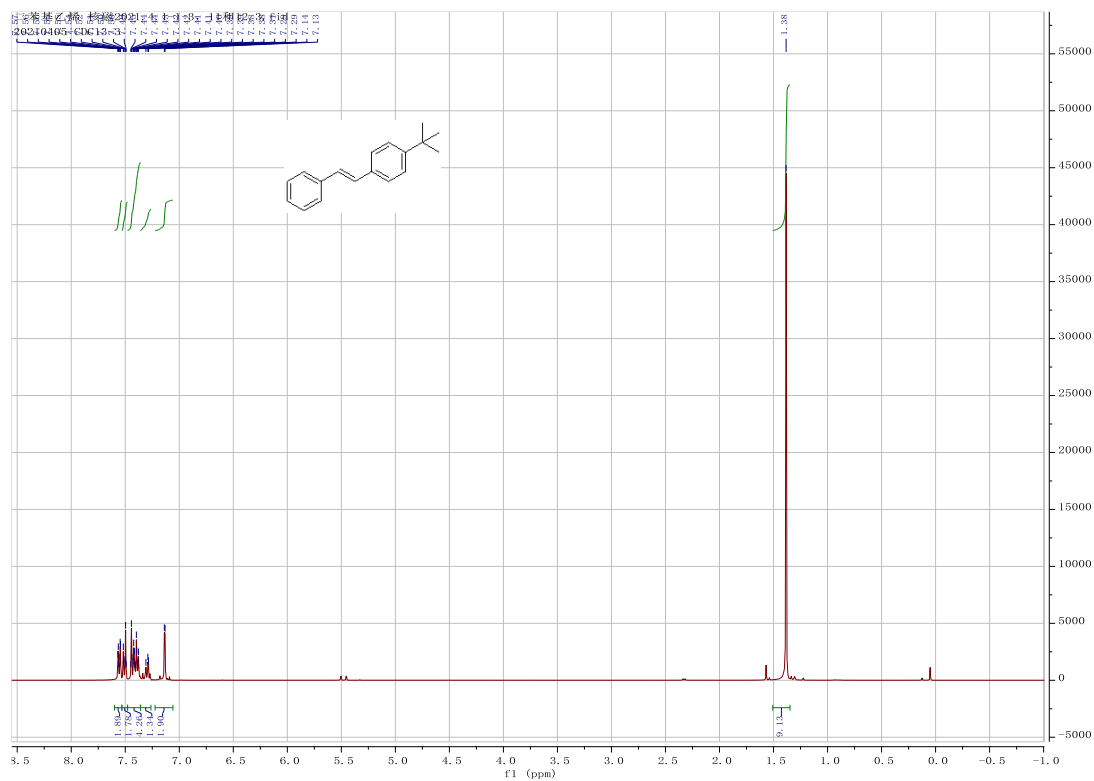

**3d:**  $^1\text{H}$  NMR (400 MHz, Chloroform-*d*)  $\delta$  7.55 (dd,  $J = 6.9, 1.8$  Hz, 3H), 7.46 – 7.37 (m, 4H), 7.32 (td,  $J = 7.4, 3.5$  Hz, 2H), 7.29 – 7.24 (m, 1H), 7.11 (q,  $J = 16.3$  Hz, 2H).

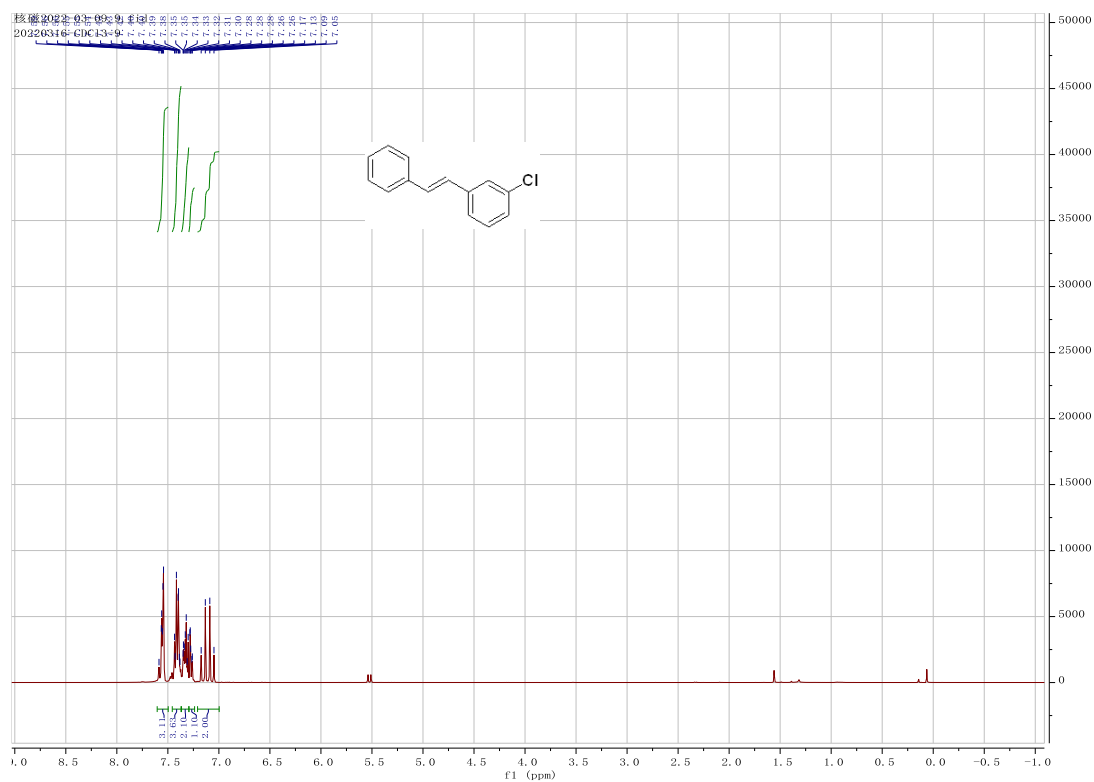

**3e:**  $^1\text{H}$  NMR (400 MHz, Chloroform- $d$ )  $\delta$  7.71 (d,  $J$  = 16.0 Hz, 1H), 7.62 – 7.50 (m, 2H), 7.48 – 7.35 (m, 3H), 6.46 (d,  $J$  = 16.0 Hz, 1H), 4.29 (q,  $J$  = 7.1 Hz, 2H), 1.36 (t,  $J$  = 7.1 Hz, 3H).

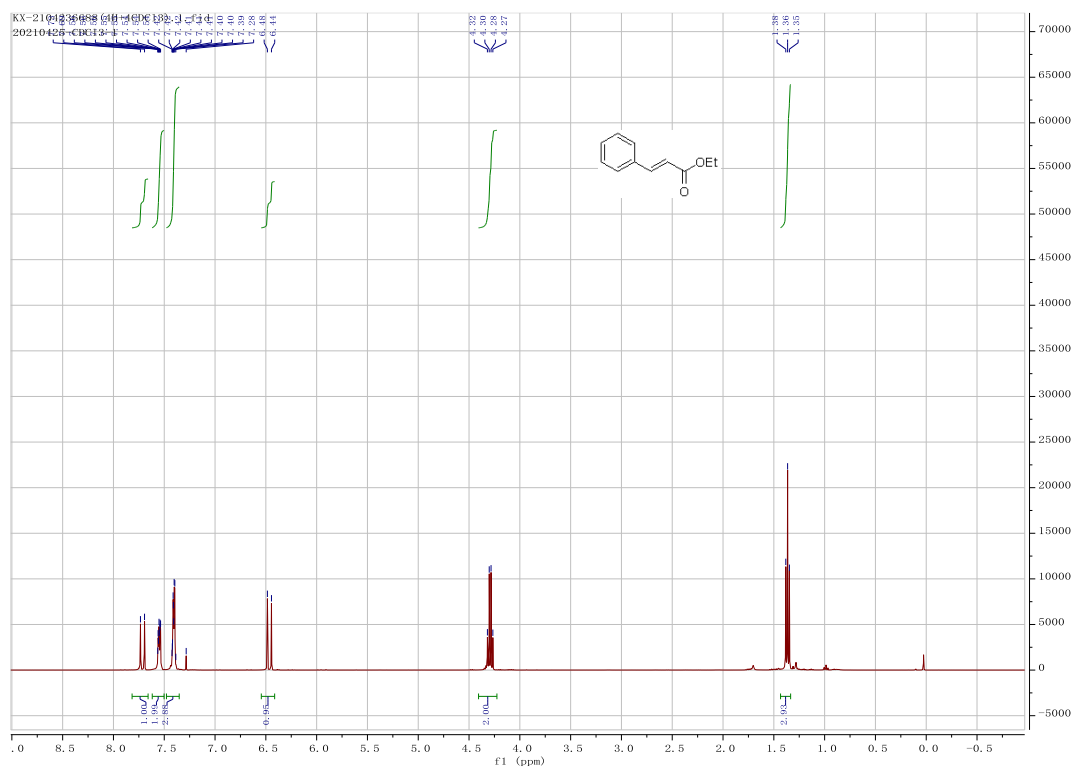

**3f:**  $^1\text{H}$  NMR (400 MHz, Chloroform- $d$ )  $\delta$  7.64 (d,  $J$  = 16.0 Hz, 1H), 7.53 (t,  $J$  = 1.9 Hz, 1H), 7.45 – 7.31 (m, 3H), 6.46 (d,  $J$  = 16.0 Hz, 1H), 4.29 (q,  $J$  = 7.1 Hz, 2H), 1.36 (t,  $J$  = 7.1 Hz, 3H).

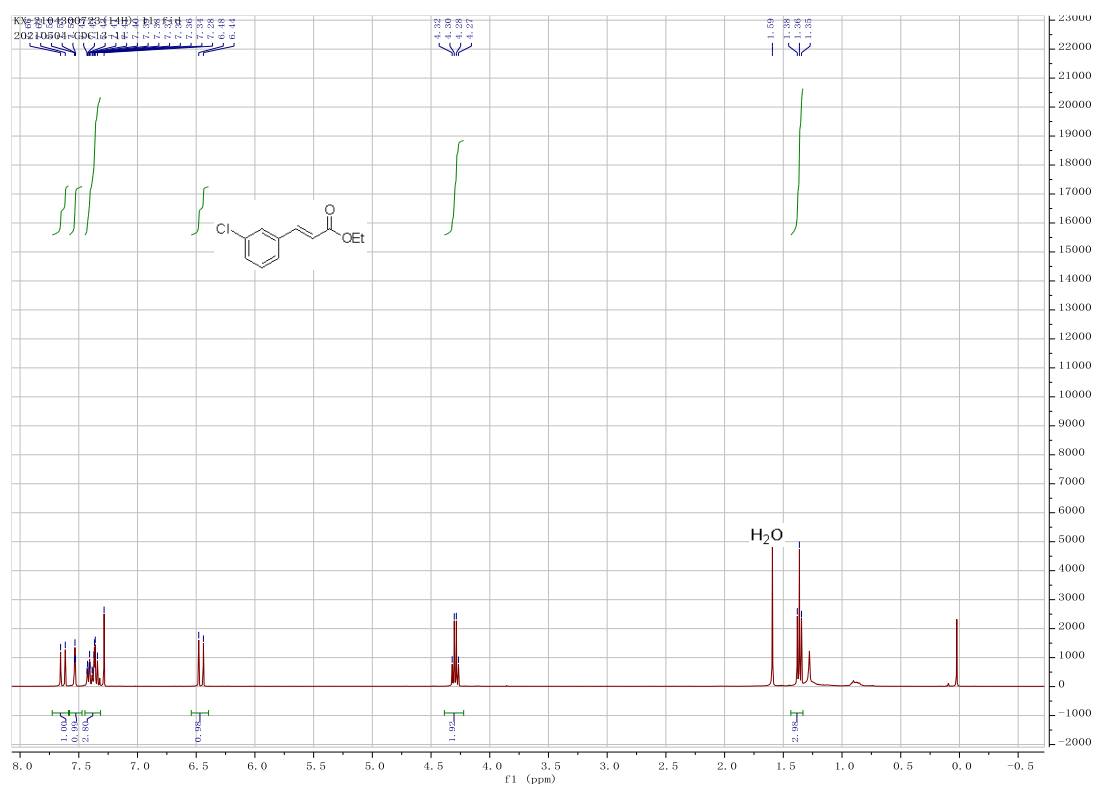

**3g:**  $^1\text{H}$  NMR (400 MHz, Chloroform- $d$ )  $\delta$  7.65 (d,  $J$  = 16.0 Hz, 1H), 7.55 – 7.45 (m, 2H), 7.45 – 7.37 (m, 2H), 6.43 (d,  $J$  = 16.0 Hz, 1H), 4.29 (q,  $J$  = 7.1 Hz, 2H), 1.36 (t,  $J$  = 7.1 Hz, 3H).

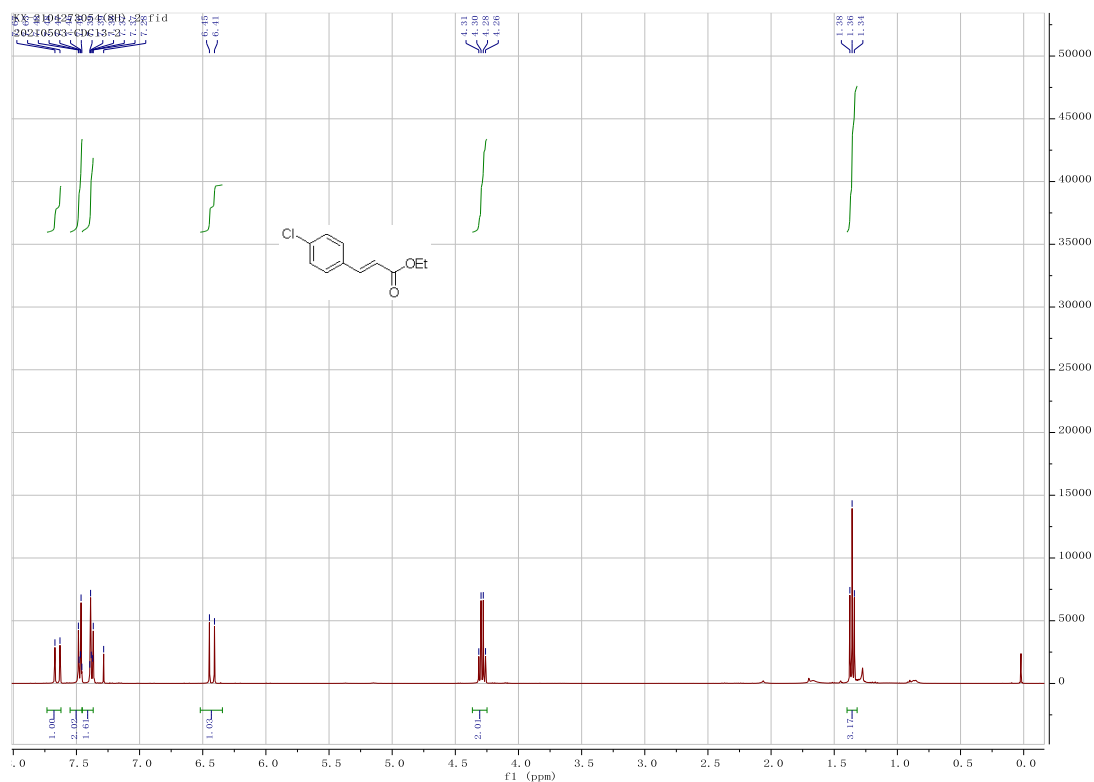

**3h:**  $^1\text{H}$  NMR (400 MHz, Chloroform- $d$ )  $\delta$  8.00 (d,  $J$  = 15.9 Hz, 1H), 7.64 – 7.53 (m, 1H), 7.35 – 7.18 (m, 4H), 6.38 (d,  $J$  = 15.9 Hz, 1H), 4.30 (q,  $J$  = 7.1 Hz, 2H), 2.47 (s, 3H), 1.37 (t,  $J$  = 7.1 Hz, 3H).

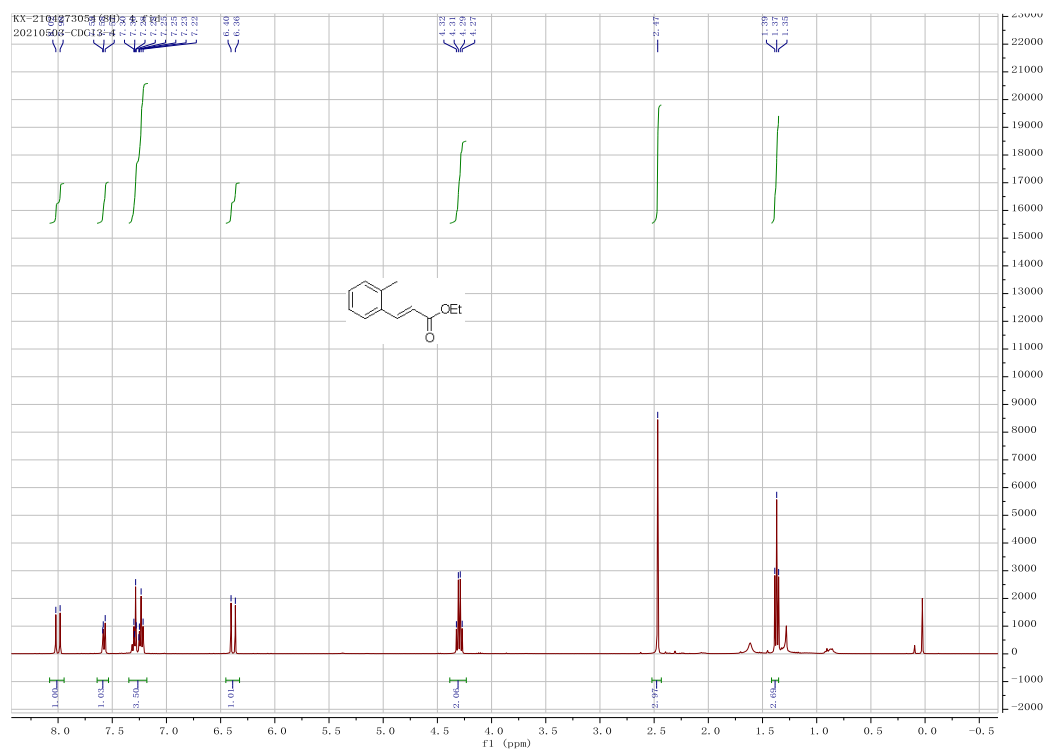

**3i:**  $^1\text{H}$  NMR (400 MHz, Chloroform- $d$ )  $\delta$  7.68 (d,  $J$  = 16.0 Hz, 1H), 7.36 (d,  $J$  = 6.9 Hz, 2H), 7.33 – 7.25 (m, 1H), 7.22 (d,  $J$  = 7.5 Hz, 1H), 6.45 (d,  $J$  = 16.0 Hz, 1H), 4.29 (q,  $J$  = 7.1 Hz, 2H), 2.39 (s, 3H), 1.36 (t,  $J$  = 7.1 Hz, 3H).

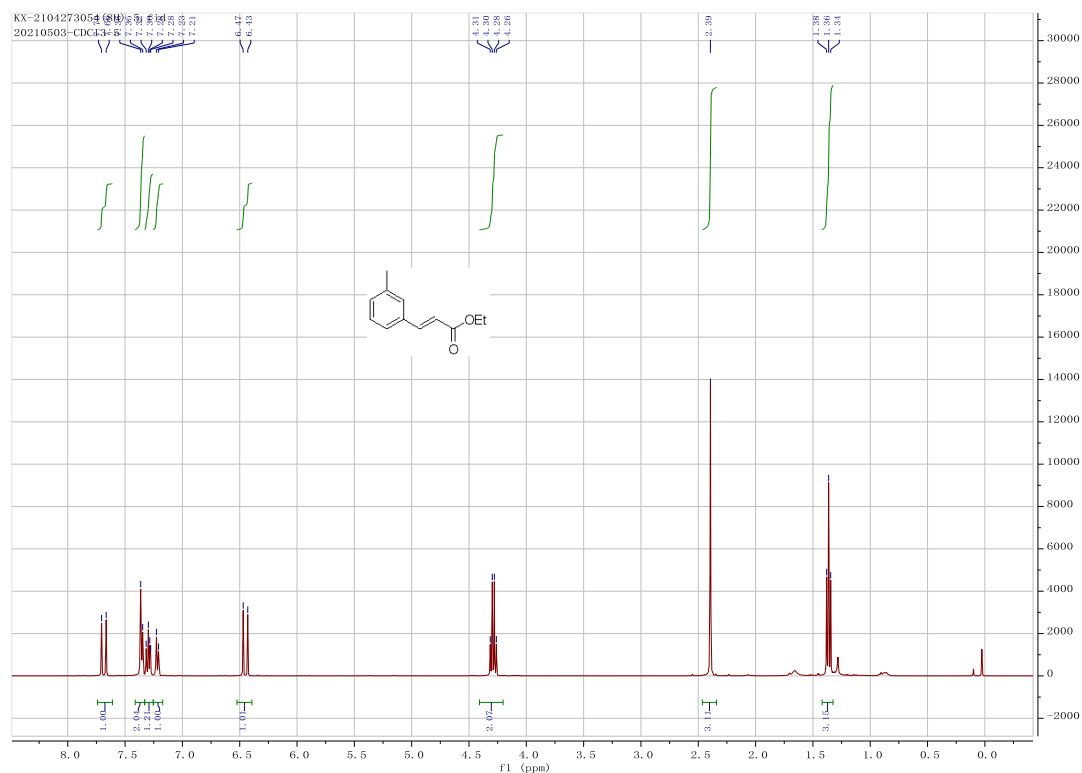

**3j:**  $^1\text{H}$  NMR (400 MHz, Chloroform- $d$ )  $\delta$  7.69 (d,  $J$  = 16.0 Hz, 1H), 7.54 – 7.40 (m, 2H), 7.21 (d,  $J$  = 7.9 Hz, 2H), 6.42 (d,  $J$  = 16.0 Hz, 1H), 4.28 (q,  $J$  = 7.1 Hz, 2H), 2.39 (s, 3H), 1.36 (t,  $J$  = 7.1 Hz, 3H).

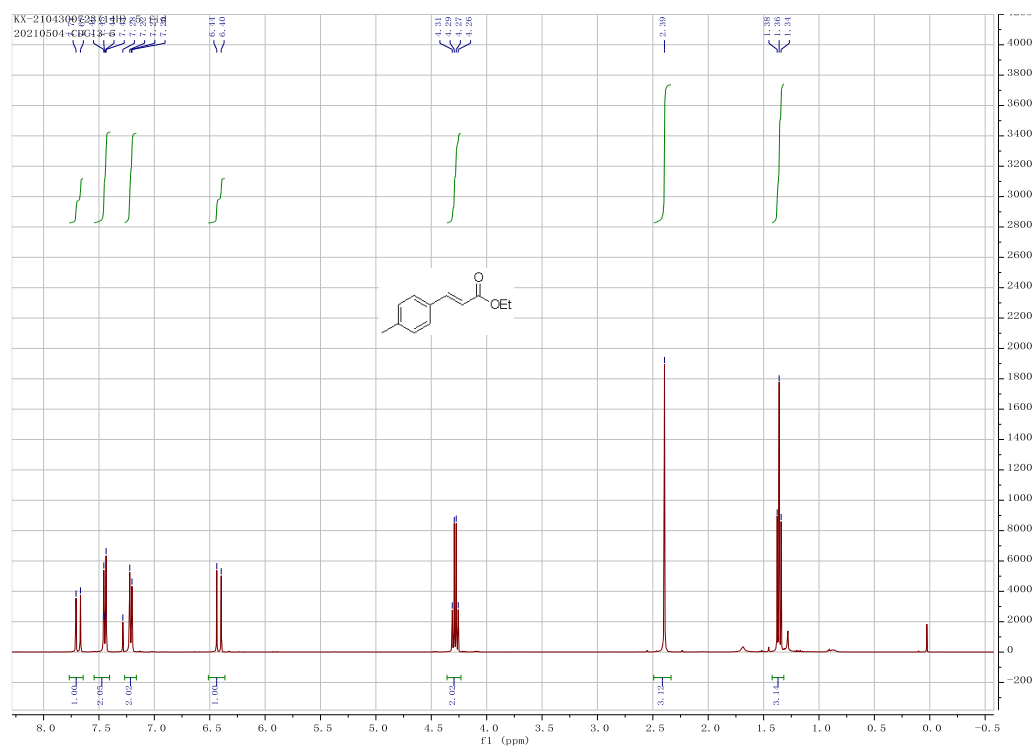

**3k:**  $^1\text{H}$  NMR (400 MHz, Chloroform- $d$ )  $\delta$  7.66 (d,  $J$  = 16.0 Hz, 1H), 7.56 – 7.45 (m, 2H), 7.01 – 6.83 (m, 2H), 6.33 (d,  $J$  = 15.9 Hz, 1H), 4.27 (q,  $J$  = 7.1 Hz, 2H), 3.85 (s, 3H), 1.35 (t,  $J$  = 7.1 Hz, 3H).

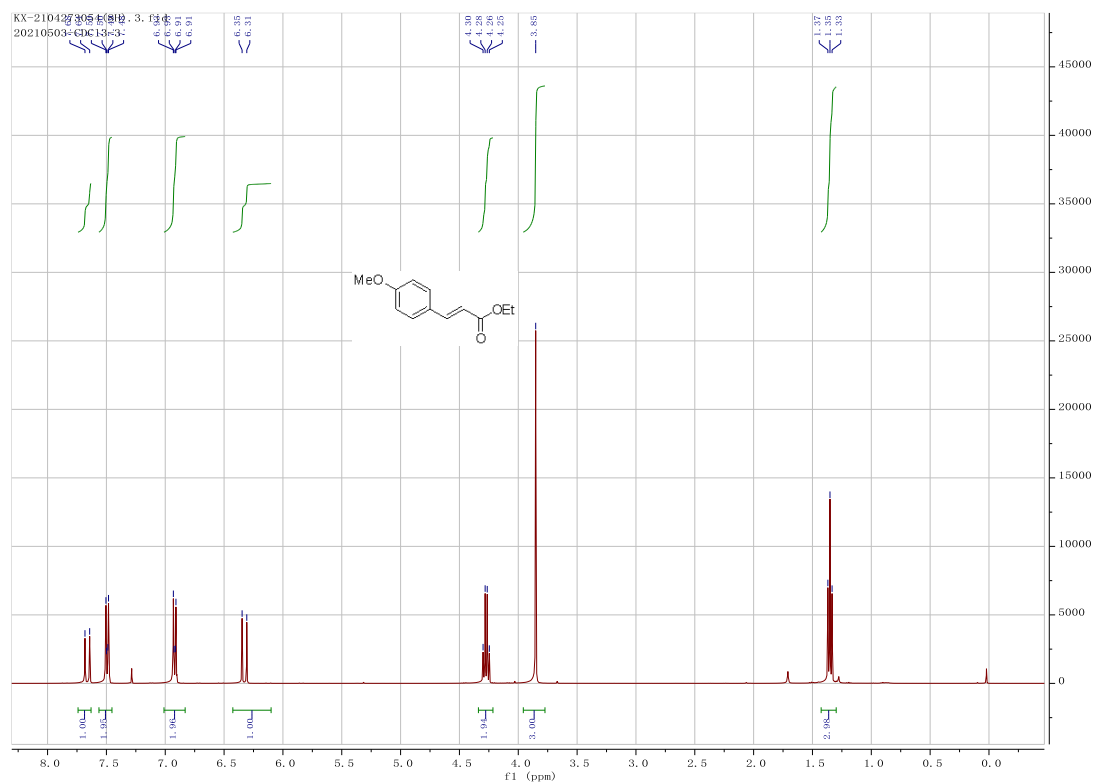

**4:**  $^1\text{H}$  NMR (400 MHz, Chloroform- $d$ )  $\delta$  7.70 – 7.62 (m, 2H), 7.55 – 7.45 (m, 2H), 7.45 – 7.37 (m, 1H).

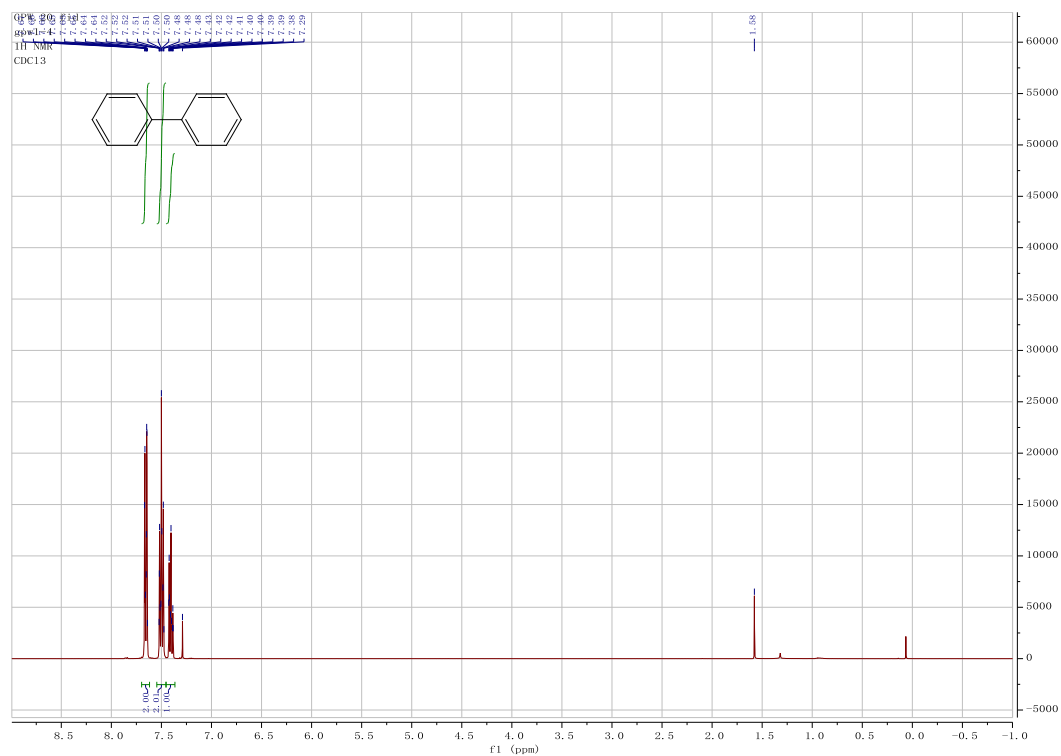



**5:**  $^1\text{H}$  NMR (600 MHz, Chloroform- $d$ )  $\delta$  7.44 – 7.31 (m, 2H), 6.96 (tt,  $J = 7.3, 1.1$  Hz, 1H), 6.87 – 6.77 (m, 2H), 3.74 (s, 2H).

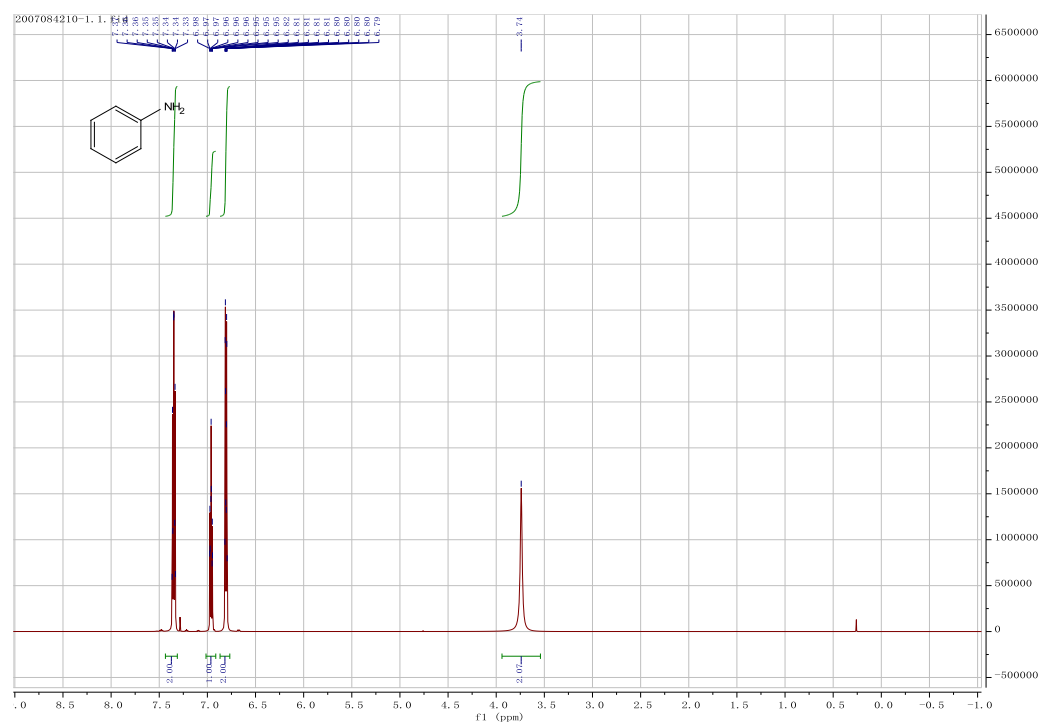

Supplement: s1 [file s1]
